# Supplementary material for: A screen for short-range paracrine interactions
Source: Royal Society of Chemistry journal article supplement (doi:10.1039/c3ib40211h), 2014-01-01
Supplement: c3ib40211h.pdf [file c3ib40211h.pdf]

## Electronic Supplementary Information

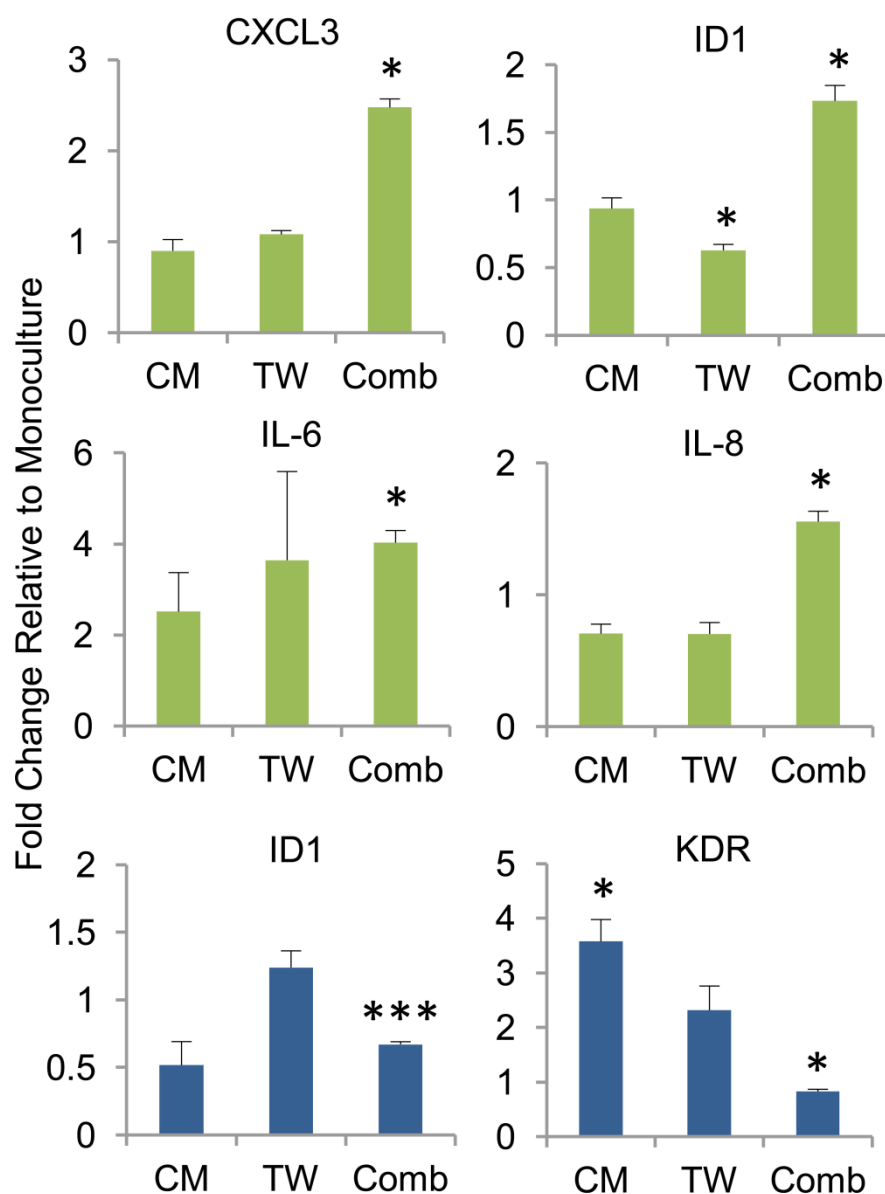

Figure S1. Gene induction as function of cell proximity. Quantification by conventional qRT-PCR of gene expression in conditioned media (CM), Transwell (TW), and comb gap (Comb) co-cultures. Here, CM and TW were performed conventionally, with cells in normal culture wells without comb substrates. In general, the trends are similar to Figure 2, in which all conditions were performed on comb substrates. Samples displaying statistically significant changes (Student's t-test) versus monoculture controls are indicated (\* =  $p < 0.05$ , \*\*\* =  $p < 0.005$ ). Bars are color-coded green for tumor-specific gene expression and blue for fibroblast-specific gene expression. Error bars are SEM.

| Gene         | Forward 5' to 3'         | Reverse 5' to 3'         |
|--------------|--------------------------|--------------------------|
| ANGPTL3      | CCAAGCCAAGAGCACCAAGAACT  | CTCCACACTCATCATGCCACCAC  |
| ANGPTL4      | GTCCTCCGCGTCTCCAGTCCT    | CATCTCGGGCAGCCTCTTTCTT   |
| CXCL3        | TGCCCTTACCAGAGCTGAAAATGA | AAGAGAAACGCTGCAGAATGGACA |
| HPRT         | GACCAGTCAACAGGGGACA      | GTGTCAATTATATCCTTCCACAA  |
| HPSE         | CCCGCCTCAGCCTCTCAAAGT    | GCCTCGGCCTCCCAAAGT       |
| ID1          | CCTCAACGGCGAGATCAG       | CGCTTCAGCGACACAAGAT      |
| IL-1 $\beta$ | AGGCCGCGTCAGTTGTTGTG     | TATATCCTGGCCGCCTTTGGTC   |
| IL-6         | CCCCAGTACCCCCAGGAGAAG    | CTGCGCAGAATGAGATGAGTTGTC |
| IL-8         | AGAAACCACCGGAAGGAACCATC  | GCAACCCTACAACAGACCCACAC  |
| KDR          | GAGCCGGCCTGTGAGTGTAATAA  | AGGAGTTGGGGGTGTGGATGC    |
| TERT         | GGTCATCGCCAGCATCATCAA    | ACGGCTGGAGGTCTGTCAAGGTAG |
| THBS1        | GCCACGGCCAACAAACAGGT     | ACAGCGGTCTCCACATCATCTC   |
| VEGFA        | AGATGTCCCGGCGAAGAGAAGA   | GGGAGGGCAGAGCTGAGTGTTAG  |

Table S2. Primer sequences employed for qRT-PCR. These were employed for the validation experiments and may be different from the primers in the qRT-PCR arrays.
